# Supplementary material for: Machine Learning-Boosted Design of Ionic Liquids for CO2 Absorption and Experimental Verification
Source: PubMed Central journal article supplement — J Phys Chem B. 2023 Feb 24;127(9):2022–7. doi: 10.1021/acs.jpcb.2c07305 (PMC10009743; doi:10.1021/acs.jpcb.2c07305), 2023-02-24
Supplement: jp2c07305_si_001.pdf [file jp2c07305_si_001.pdf]

# Machine Learning Boosted Design of Ionic Liquids for CO<sub>2</sub> Absorption and Experimental Verification

*Nahoko Kuroki<sup>1,2\*</sup>, Yuki Suzuki<sup>3</sup>, Daisuke Kodama<sup>3\*</sup>, Firoz Alam Chowdhury<sup>4</sup>,  
Hidetaka Yamada<sup>4,5</sup>, Hirotohi Mori<sup>1\*</sup>*

<sup>1</sup> Department of Applied Chemistry, Faculty of Science and Engineering, Chuo University,  
1-13-27 Kasuga, Bunkyo-ku, Tokyo 112-8551, Japan

<sup>2</sup> Japan Science and Technology Agency, ACT-X,  
4-1-8 Honcho, Kawaguchi, Saitama 332-0012, Japan

<sup>3</sup> Department of Chemical Biology and Applied Chemistry, College of Engineering, Nihon University,  
1 Nakagawara, Tokusada, Tamura-machi, Koriyama, Fukushima 963-8642, Japan

<sup>4</sup> Research Institute of Innovative Technology for the Earth,  
9-2 Kizugawadai, Kizugawa, Kyoto 619-0292, Japan

<sup>5</sup> Frontier Science and Social Co-creation Initiative, Kanazawa University,  
Kakuma-machi, Kanazawa, Ishikawa 920-1192, Japan

\* Corresponding authors:

kuroki.91d@g.chuo-u.ac.jp (N. Kuroki),  
kodama.daisuke@nihon-u.ac.jp (D. Kodama),  
qc-forest.19d@g.chuo-u.ac.jp (H. Mori).

## **Supporting Methods**

**1. Chemical space and features for machine learning** S3

**2. Synthesis** S6

**3. Measurements** S9

**Supporting Results** S11

**Supporting References** S23

## Supporting Methods

### 1. Chemical space and features for machine learning

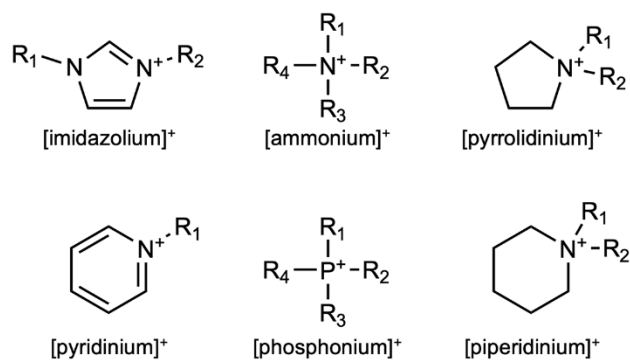

**Figure S1.** General structures of the cations.

**Table S1.** List of anions.

| Class                 | Structures |
|-----------------------|------------|
| Fluorine-inorganic    |            |
| Nonfluorine-inorganic |            |
| Fluorine-organic      |            |
| Nonfluorine-organic   |            |

**Table S2.** Features used.

| Class      | Feature                                                 | Symbol                                                                                                                            |                    |
|------------|---------------------------------------------------------|-----------------------------------------------------------------------------------------------------------------------------------|--------------------|
| Geometric  | Volume                                                  | $V$                                                                                                                               |                    |
|            | Surface area                                            | $A$                                                                                                                               |                    |
|            | Molecular weight                                        | MW                                                                                                                                |                    |
|            | Number of conformers                                    | $N_{\text{conf}}$                                                                                                                 |                    |
| Electronic | $M_i = \int p(\sigma) f_i(\sigma) d\sigma$ <sup>a</sup> | $f_i(\sigma)$                                                                                                                     |                    |
|            | $\sigma$ -moments                                       |                                                                                                                                   |                    |
|            | 2 <sup>nd</sup>                                         | $\sigma^2$                                                                                                                        | $M_2$              |
|            | 3 <sup>rd</sup>                                         | $\sigma^3$                                                                                                                        | $M_3$              |
|            | 4 <sup>th</sup>                                         | $\sigma^4$                                                                                                                        | $M_4$              |
|            | 5 <sup>th</sup>                                         | $\sigma^5$                                                                                                                        | $M_5$              |
|            | 6 <sup>th</sup>                                         | $\sigma^6$                                                                                                                        | $M_6$              |
|            | Hydrogen bonding (HB) moments <sup>b</sup>              |                                                                                                                                   |                    |
|            | <i>acceptor</i>                                         | $\begin{cases} 0 & (+\sigma \leq \sigma_{\text{HB}}) \\ \sigma + \sigma_{\text{HB}} & (+\sigma > \sigma_{\text{HB}}) \end{cases}$ | $M_{\text{HBacc}}$ |
|            | <i>donor</i>                                            | $\begin{cases} 0 & (-\sigma \leq \sigma_{\text{HB}}) \\ \sigma - \sigma_{\text{HB}} & (-\sigma > \sigma_{\text{HB}}) \end{cases}$ | $M_{\text{HBdon}}$ |

a)  $p(\sigma)$ :  $\sigma$ -profile, which represents surface charge density distribution,  $\sigma$ .

b) A threshold of  $\sigma_{\text{HB}} = 0.1$  was used.

## 2. Synthesis

The chemicals used in this study are listed in **Table S3**. The detailed synthesis procedures for  $[P_{66614}][A]$  ( $A = \text{TFSA}$ ,  $\text{PFOS}$ , and  $\text{PF}_6$ ) were as follows.

**$[P_{66614}][\text{TFSA}]$** .<sup>1</sup>  $[P_{66614}][\text{Cl}]$  (25 g, 48.1 mmol) was dissolved in  $\text{CH}_2\text{Cl}_2$  (150 mL). An aqueous solution of  $\text{Li}[\text{TFSA}]$  (16.7 g, 58.2 mmol, 50 mL) was added dropwise. The reaction mixture was stirred for 12 h at room temperature. Then,  $\text{CH}_2\text{Cl}_2$  (100 mL) and water (150 mL) were added, and the separated organic layer was washed with water until the aqueous layer produced no precipitation in the silver nitrate test.  $\text{CH}_2\text{Cl}_2$  was removed using a rotary evaporator under reduced pressure. The obtained product was dried under vacuum at 333 K to yield a light-yellow viscous liquid (35.7 g, 97 mol%).

**$[P_{66614}][\text{PFOS}]$** .<sup>2</sup>  $[P_{66614}][\text{Cl}]$  (25 g, 48.1 mmol) was dissolved in  $\text{CH}_2\text{Cl}_2$  (150 mL). An aqueous solution of  $\text{K}[\text{PFOS}]$  (31.4 g, 58.2 mmol, 50 mL) was added dropwise. The reaction mixture was stirred for 16 h at room temperature. Then,  $\text{CH}_2\text{Cl}_2$  (100 mL) and water (150 mL) were added, and the separated organic layer was washed with water until a neutral pH was obtained in the water wash.  $\text{CH}_2\text{Cl}_2$  was removed using a rotary evaporator under reduced pressure. The obtained product was dried under vacuum at 333 K to yield a pale-yellow viscous liquid (45.2 g, 96 mol%).

**$[P_{66614}][\text{PF}_6]$** .<sup>1</sup>  $[P_{66614}][\text{Cl}]$  (25 g, 48.1 mmol) was dissolved in  $\text{CH}_2\text{Cl}_2$  (150 mL). An aqueous solution of  $\text{Li}[\text{PF}_6]$  (8.84 g, 58.2 mmol, 50 mL) was added dropwise. The reaction mixture was stirred for 12 h at room temperature. Then,  $\text{CH}_2\text{Cl}_2$  (100 mL) and water (150 mL) were added, and the separated organic layer was washed with water until the aqueous layer produced no precipitation in the silver nitrate test.  $\text{CH}_2\text{Cl}_2$  was removed using a rotary evaporator under reduced pressure. The obtained product was dried under vacuum at 333 K to yield a pale-yellow viscous liquid (29.5 g, 97 mol%).

The obtained ILs were further dried under vacuum for 72 h at 343 K before measurements. The ILs were identified with liquid chromatography/electrospray ionization-mass spectrometry (LC/ESI-MS: Waters, 2695/ZQ2000) (**Figure S2**). The water content of the ILs was determined by Karl-Fischer titration (Kyoto Electronics Manufacturing Co., Ltd., MKC-520), resulting in 67, 116, and 156 ppm for  $[P_{66614}][A]$  with  $A = \text{TFSA}$ ,  $\text{PFOS}$ , and  $\text{PF}_6$ , respectively.

**Table S3.** Chemicals used in this study.

| Chemical                                                                                                  | CASRN <sup>®</sup> | Source                                     | Purity       | Analysis method     |
|-----------------------------------------------------------------------------------------------------------|--------------------|--------------------------------------------|--------------|---------------------|
| <b>[P<sub>66614</sub>][TFSA]</b><br>trihexyl(tetradecyl)phosphonium<br>bis(trifluoromethanesulfonyl)amide | 460092-03-9        | Synthesized                                | >97 mol%     | LC/ESI-MS           |
| <b>[P<sub>66614</sub>][PFOS]</b><br>trihexyl(tetradecyl)phosphonium<br>perfluorooctanesulfonate           |                    | Synthesized                                | >96 mol%     | LC/ESI-MS           |
| <b>[P<sub>66614</sub>][PF<sub>6</sub>]</b><br>trihexyl(tetradecyl)phosphonium<br>hexafluorophosphate      | 374683-44-0        | Synthesized                                | >97 mol%     | LC/ESI-MS           |
| <b>[P<sub>66614</sub>][Cl]</b><br>trihexyl(tetradecyl)phosphonium<br>chloride                             | 258864-54-9        | Tokyo Chemical Industry Co., Ltd.          | >97 mol%     | Volumetric analysis |
| <b>Li[TFSA]</b><br>lithium<br>bis(trifluoromethanesulfonyl)amide                                          | 90076-65-6         | Tokyo Chemical Industry Co., Ltd.          | >98 mol%     | Volumetric analysis |
| <b>K[PFOS]</b><br>potassium heptadecafluorooctane-1-<br>sulphonate                                        | 2795-39-3          | Sigma-Aldrich                              | >98 mol%     | Volumetric analysis |
| <b>Li[PF<sub>6</sub>]</b><br>lithium hexafluorophosphate                                                  | 21324-40-3         | Tokyo Chemical Industry Co., Ltd.          | >97 mol%     | Volumetric analysis |
| <b>CH<sub>2</sub>Cl<sub>2</sub></b><br>dichloromethane                                                    | 75-09-2            | FUJIFILM Wako Pure Chemical<br>Corporation | >99.5 mass%  | Gas chromatography  |
| <b>CO<sub>2</sub></b><br>carbon dioxide                                                                   | 124-38-9           | Showa Denko Gas Products Co., Ltd.         | >99.999 vol% | Gas chromatography  |

[P<sub>66614</sub>][TFSA]

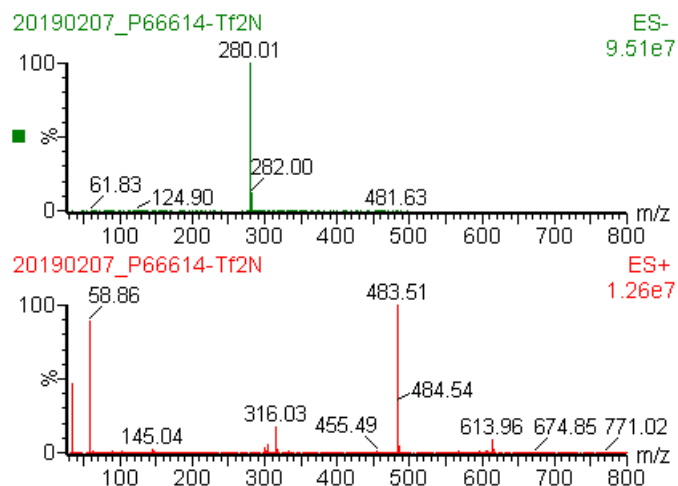

[P<sub>66614</sub>][PFOS]

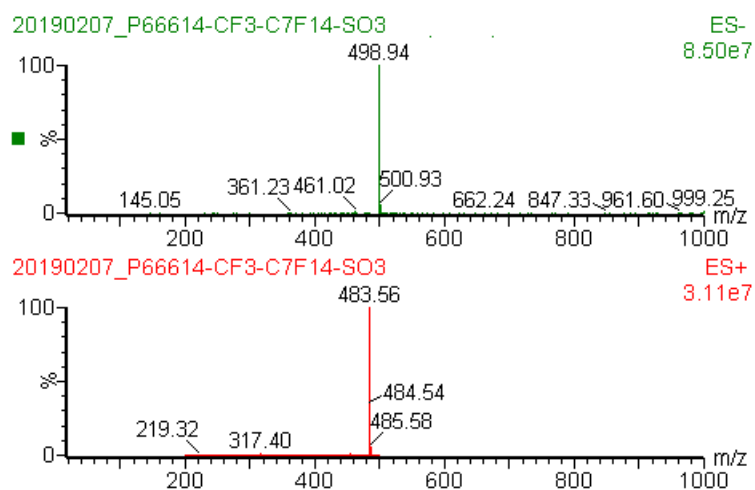

[P<sub>66614</sub>][PF<sub>6</sub>]

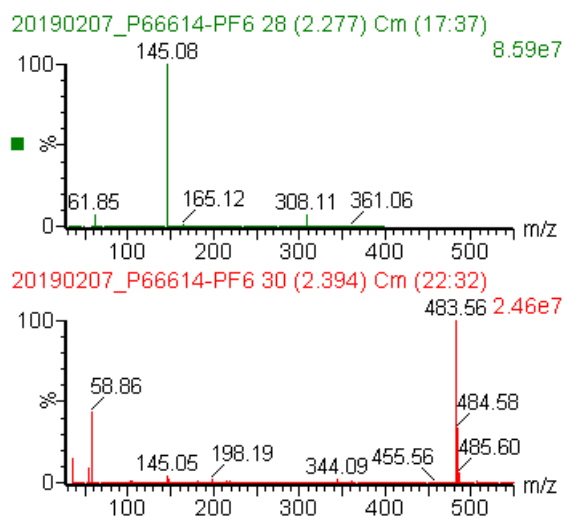

Figure S2. LC/ESI-MS spectra of [P<sub>66614</sub>][A] (A = TFSA, PFOS, and PF<sub>6</sub>).



### 3. Measurements

- **Atmospheric pressure**

The experimental apparatuses for the density and viscosity measurements were the same as those used in our previous studies.<sup>3-5</sup> The density of an IL was determined using a vibrating tube densimeter (Anton Paar, DMA 5000M). The instrumental constants were calibrated with dry air and Milli-Q water (Millipore Direct-Q3 UV). The viscosity of an IL was measured using a rotating-cylinder viscometer (Anton Paar, Stabinger SVM 3000) equipped with a built-in densimeter. We confirmed the validity of the viscometer readings using reference samples (S60, N100, and S200) supplied by the Cannon Instrument Company. The samples were transferred to a gastight syringe under a dry nitrogen atmosphere (dew point less than 243 K) and injected into the instrument without contacting moisture. The expanded uncertainties for the densities and viscosities were  $0.05 \text{ kg}\cdot\text{m}^{-3}$  and  $<2\%$ , respectively.

- **High pressure**

The experimental apparatus for the high-pressure density measurement was the same as that used in our previous studies.<sup>6,7</sup> The high-pressure density of an IL was measured using a vibrating tube densimeter (Anton Paar, DMA HP). The pressure was generated with a syringe pump (Nova Swiss, 550.0202.1) and measured by a pressure gauge (Druck, PDCR 911) with a pressure indicator (Druck DPI 145). The standard uncertainties in the temperature, pressure, and density were 0.01 K, 0.006 MPa, and  $0.2 \text{ kg}\cdot\text{m}^{-3}$ , respectively. The instrumental constants were calibrated at 298.15–353.15 K with helium, ultrapure water (Millipore Direct-Q 3 UV), and toluene up to 50 MPa, and with carbon tetrachloride at atmospheric pressure. The high-pressure densities of  $[\text{P}_{66614}][\text{A}]$  (A = TFSA and PFOS) and  $[\text{P}_{66614}][\text{PF}_6]$  were measured at 313.15–353.15 K and 323.15–353.15 K, respectively, up to 50 MPa.

### 3.3 Equations used

|                                         |                                                                                                                                                                                                                                                |
|-----------------------------------------|------------------------------------------------------------------------------------------------------------------------------------------------------------------------------------------------------------------------------------------------|
| Quadratic equation                      | $\rho = a + bT + cT^2$                                                                                                                                                                                                                         |
| Arrhenius equation                      | $\eta = A \exp\left(\frac{E_a}{RT}\right)$                                                                                                                                                                                                     |
| Vogel–Fulcher–Tammann<br>(VFT) equation | $\eta = A \exp\left(\frac{B}{T - T_0}\right)$                                                                                                                                                                                                  |
| <b>Equation of state (EoS)</b>          |                                                                                                                                                                                                                                                |
| Tait <sup>8</sup>                       | $v_{\text{IL}} = \frac{1}{\rho} = \frac{1}{\rho_0} \left\{ 1 - C \ln\left(1 + \frac{p}{B}\right) \right\}$ $\rho_0 = a_0 + a_1T + a_2T^2, \quad B = b_0 \exp(-b_1T)$                                                                           |
| Sanchez–Lacombe <sup>9,10</sup>         | $\tilde{\rho}^2 + \tilde{p} + \tilde{T} \left\{ \ln(1 - \tilde{\rho}) + \left(1 - \frac{1}{r}\right) \tilde{\rho} \right\} = 0$ $\left( \tilde{p} = \frac{p}{p^*}, \quad \tilde{T} = \frac{T}{T^*}, \quad r = \frac{Mp^*}{RT^*\rho^*} \right)$ |
| Average relative deviation<br>(ARD)     | $ARD\% = \frac{100}{\#\text{data}} \sum \frac{ (\text{exp. value}) - (\text{calc. value}) }{(\text{exp. value})}$                                                                                                                              |

$\rho$ : Density,  $\eta$ : Viscosity,  $p$ : Pressure,  $T$ : Temperature,  $R$ : Gas constant,  $E_a$ : Activation energy,  $v_{\text{IL}}$ : Specific volume,  $\{A-C, a_i, b_i\}$ : Constants. Asterisk and tilde indicate critical parameters and reduced properties, respectively.

## Supporting Results

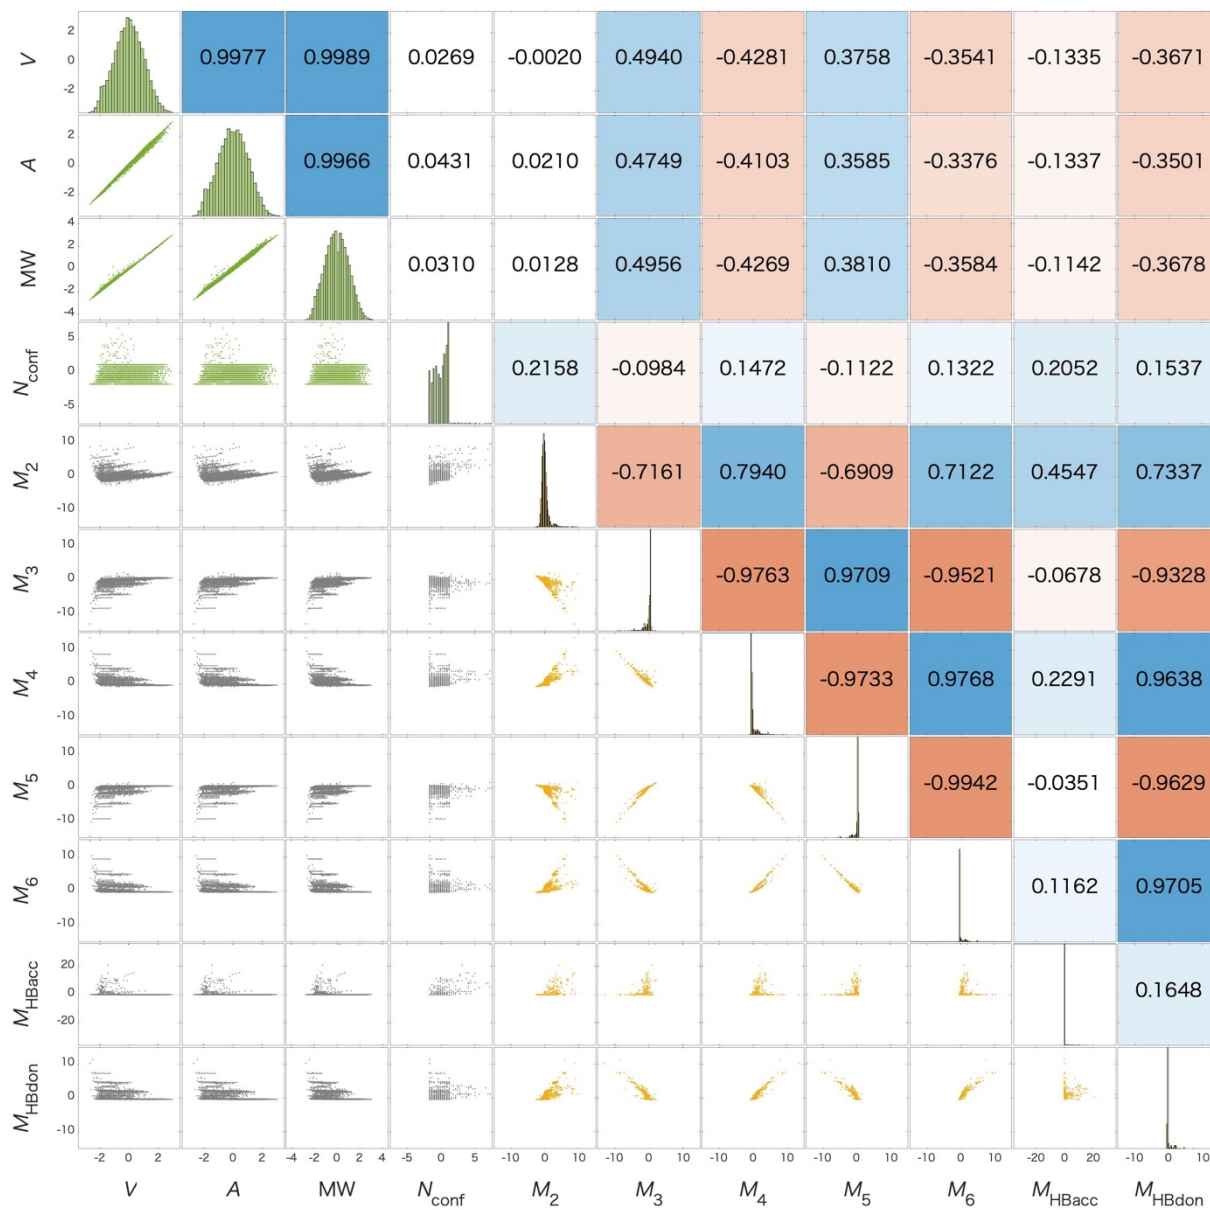

**Figure S3.** The correlation matrix of cation features. Upper and lower triangles show the correlation coefficients and bivariate scatter plots, respectively. The diagonal shows the distribution of each feature.

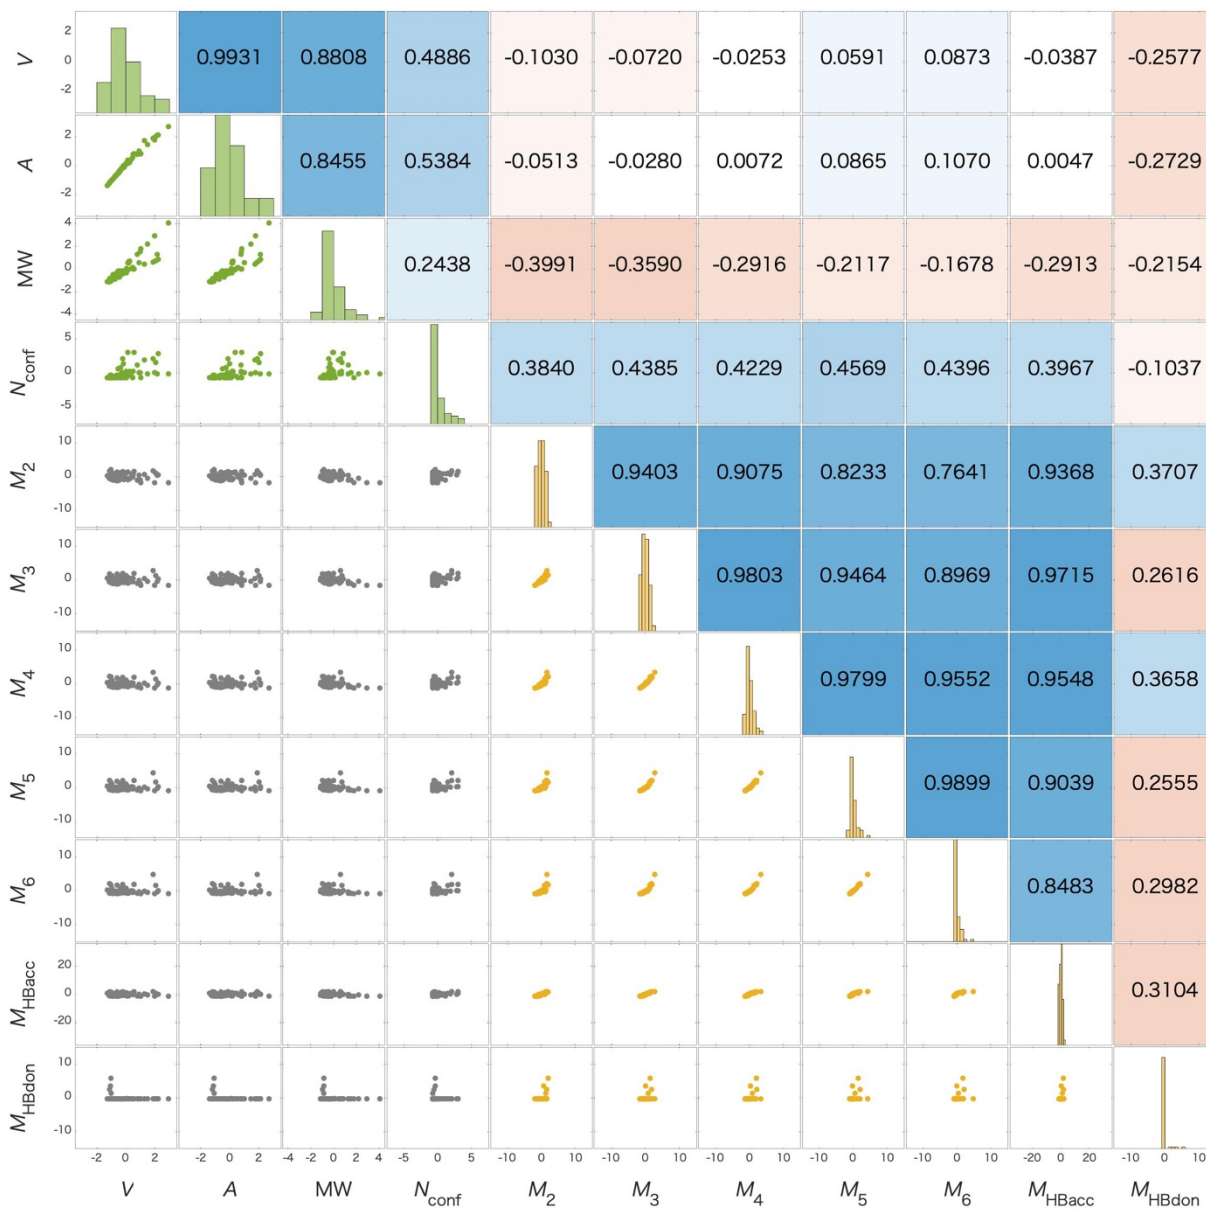

**Figure S4.** The correlation matrix of anion features. Upper and lower triangles show the correlation coefficients and bivariate scatter plots, respectively. The diagonal shows the distribution of each feature.

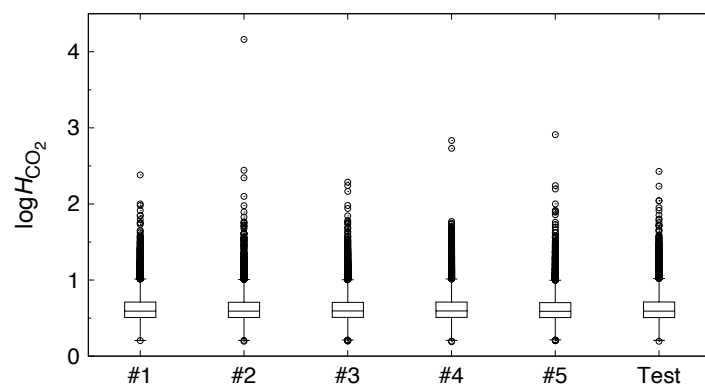

**Figure S5.** The distribution of training (#1–5) and test data sets. Each set includes 10,000 ILs randomly selected from the total 402,114 candidates.

**Table S4.** Change in the coefficient of determination for each trained model optimized by the wrapper method. The numbers of features are doubled with respect to the wrapper cycle because ILs consist of a cation–anion pair. The order of the features is sorted to achieve the highest performance in each wrapper cycle. The data in bold numerals are depicted in **Figure 2(a)**.

| Cycle<br>(# Features) | 1<br>(2)    | 2<br>(4)    | 3<br>(6)    | 4<br>(8)    | 5<br>(10)   | 6<br>(12)   | 7<br>(14)   | 8<br>(16)   | 9<br>(18)   | 10<br>(20)  | 11<br>(22)  |
|-----------------------|-------------|-------------|-------------|-------------|-------------|-------------|-------------|-------------|-------------|-------------|-------------|
| $V$                   | <b>0.38</b> |             |             |             |             |             |             |             |             |             |             |
| $M_2$                 | 0.24        | <b>0.84</b> |             |             |             |             |             |             |             |             |             |
| MW                    | 0.54        | 0.46        | <b>0.88</b> |             |             |             |             |             |             |             |             |
| $M_5$                 | 0.17        | 0.39        | 0.74        | <b>0.89</b> |             |             |             |             |             |             |             |
| $M_6$                 | <0          | <0          | 0.73        | 0.90        | <b>0.91</b> |             |             |             |             |             |             |
| $A$                   | 0.54        | 0.38        | 0.79        | 0.87        | 0.87        | <b>0.91</b> |             |             |             |             |             |
| $M_3$                 | 0.26        | 0.58        | 0.81        | 0.88        | 0.89        | 0.89        | <b>0.92</b> |             |             |             |             |
| $M_4$                 | 0.23        | 0.61        | 0.87        | 0.90        | 0.82        | 0.85        | 0.89        | <b>0.91</b> |             |             |             |
| $N_{\text{conf}}$     | 0.01        | 0.31        | 0.77        | 0.84        | 0.83        | 0.88        | 0.90        | 0.91        | <b>0.91</b> |             |             |
| $M_{\text{HBdon}}$    | 0.24        | 0.07        | 0.35        | 0.82        | 0.85        | 0.86        | 0.89        | 0.91        | 0.89        | <b>0.89</b> |             |
| $M_{\text{HBacc}}$    | 0.06        | 0.22        | 0.87        | 0.92        | 0.91        | 0.89        | 0.91        | 0.92        | 0.90        | 0.90        | <b>0.90</b> |

**Table S5.** Change in the root mean square error for each trained model optimized by the wrapper method. The numbers of features are doubled with respect to the wrapper cycle because ILs consist of a cation–anion pair. The order of the features is sorted to achieve the highest performance in each wrapper cycle. The data in bold numerals are depicted in **Figure 2(a)**.

| Cycle<br>(# Features) | 1<br>(2)    | 2<br>(4)    | 3<br>(6)    | 4<br>(8)    | 5<br>(10)   | 6<br>(12)   | 7<br>(14)   | 8<br>(16)   | 9<br>(18)   | 10<br>(20)  | 11<br>(22)  |
|-----------------------|-------------|-------------|-------------|-------------|-------------|-------------|-------------|-------------|-------------|-------------|-------------|
| $V$                   | <b>3.67</b> |             |             |             |             |             |             |             |             |             |             |
| $M_2$                 | 4.38        | <b>1.84</b> |             |             |             |             |             |             |             |             |             |
| MW                    | 3.40        | 3.38        | <b>1.68</b> |             |             |             |             |             |             |             |             |
| $M_5$                 | 4.56        | 3.85        | 2.42        | <b>1.56</b> |             |             |             |             |             |             |             |
| $M_6$                 | 16.07       | 19.71       | 2.33        | 1.60        | <b>1.54</b> |             |             |             |             |             |             |
| $A$                   | 3.34        | 3.59        | 2.04        | 1.72        | 1.71        | <b>1.48</b> |             |             |             |             |             |
| $M_3$                 | 4.32        | 3.24        | 2.12        | 1.70        | 1.63        | 1.64        | <b>1.40</b> |             |             |             |             |
| $M_4$                 | 4.40        | 3.08        | 1.77        | 1.60        | 2.05        | 1.91        | 1.66        | <b>1.50</b> |             |             |             |
| $N_{\text{conf}}$     | 4.98        | 3.76        | 2.30        | 1.87        | 1.84        | 1.70        | 1.60        | 1.49        | <b>1.47</b> |             |             |
| $M_{\text{HBdon}}$    | 4.36        | 4.31        | 3.63        | 2.05        | 1.96        | 1.88        | 1.68        | 1.52        | 1.68        | <b>1.65</b> |             |
| $M_{\text{HBacc}}$    | 4.86        | 3.96        | 1.75        | 1.39        | 1.48        | 1.66        | 1.53        | 1.38        | 1.57        | 1.58        | <b>1.54</b> |

**Table S6.** Change in the mean absolute error for each trained model optimized by the wrapper method. The numbers of features are doubled with respect to the wrapper cycle because ILs consist of a cation–anion pair. The order of the features is sorted to achieve the highest performance in each wrapper cycle. The data in bold numerals are depicted in **Figure 2(a)**.

| Cycle<br>(# Features) | 1<br>(2)     | 2<br>(4)     | 3<br>(6)     | 4<br>(8)     | 5<br>(10)    | 6<br>(12)    | 7<br>(14)    | 8<br>(16)    | 9<br>(18)    | 10<br>(20)   | 11<br>(22)   |
|-----------------------|--------------|--------------|--------------|--------------|--------------|--------------|--------------|--------------|--------------|--------------|--------------|
| $V$                   | <b>0.481</b> |              |              |              |              |              |              |              |              |              |              |
| $M_2$                 | 1.445        | <b>0.189</b> |              |              |              |              |              |              |              |              |              |
| MW                    | 0.564        | 0.439        | <b>0.163</b> |              |              |              |              |              |              |              |              |
| $M_5$                 | 1.262        | 0.400        | 0.180        | <b>0.146</b> |              |              |              |              |              |              |              |
| $M_6$                 | 1.388        | 0.523        | 0.184        | 0.148        | <b>0.138</b> |              |              |              |              |              |              |
| $A$                   | 0.610        | 0.405        | 0.186        | 0.153        | 0.140        | <b>0.130</b> |              |              |              |              |              |
| $M_3$                 | 1.163        | 0.375        | 0.177        | 0.152        | 0.138        | 0.136        | <b>0.123</b> |              |              |              |              |
| $M_4$                 | 1.231        | 0.333        | 0.177        | 0.148        | 0.159        | 0.145        | 0.129        | <b>0.122</b> |              |              |              |
| $N_{\text{conf}}$     | 1.691        | 0.441        | 0.202        | 0.164        | 0.149        | 0.143        | 0.130        | 0.124        | <b>0.122</b> |              |              |
| $M_{\text{HBdon}}$    | 1.363        | 0.390        | 0.198        | 0.160        | 0.149        | 0.145        | 0.126        | 0.121        | 0.120        | <b>0.117</b> |              |
| $M_{\text{HBacc}}$    | 1.602        | 0.460        | 0.190        | 0.148        | 0.144        | 0.143        | 0.135        | 0.122        | 0.126        | 0.126        | <b>0.115</b> |



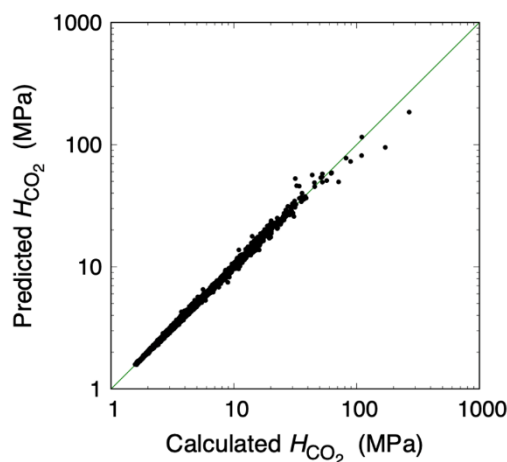

**Figure S6.** Correlation between Henry’s law constants predicted by the Gaussian process regression model (machine learning) and calculated by COSMO-RS (statistical thermodynamics calculation) for 10,000 randomly selected entries of the test data not used to train the model.

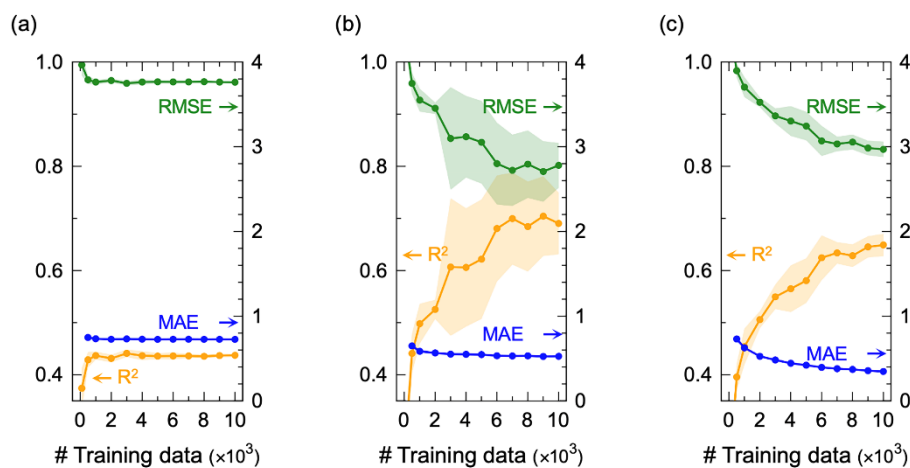

**Figure S7.** Learning curves for the test data not used to train the model with respect to the number of features. (a) Linear, (b) XGBoost, and (c) random forest regression were used to create the models.  $V$ ,  $M_2$ ,  $MW$ ,  $M_5$ ,  $M_6$ , and  $A$  were used for the features. For (a), ordinary least squares regression was applied without robust fitting. For (b) and (c), 30 ensemble learning cycles were trained with 0.1 learning rate for shrinkage.

**Table S7.** Predicted Henry's law constants  $H_{CO_2}$  (MPa) for phosphonium-based ILs ([P<sub>66614</sub>][A]).

|                                             | $H_{CO_2}$ |
|---------------------------------------------|------------|
| Tris(nonafluorobutyl)trifluorophosphate     | 1.79       |
| Tris(perfluoropropyl)trifluorophosphate     | 1.91       |
| Tris(pentafluoroethyl)trifluorophosphate    | 2.09       |
| Bis(biphenyl-2,2'-diylbisoxy)borate         | 2.50       |
| Bis(2,4,4-trimethylpentyl)dithiophosphinate | 2.65       |
| Pentafluoroethyltrifluoroborate             | 2.76       |
| Bis(pentafluoroethylsulfonyl)amide          | 2.76       |
| Perfluorooctanesulfonate (PFOS)             | 2.78       |
| Tris(trifluoromethanesulfonyl)methide       | 2.81       |
| Tetrachloroborate                           | 2.82       |
| Bis(2,4,4-trimethylpentyl)thiophosphinate   | 2.86       |
| Bis(pentafluoroethyl)phosphinate            | 2.87       |
| Bis(trifluoromethyl)amide                   | 2.89       |
| Trifluoro(trifluoromethyl)borate            | 2.90       |
| Hexafluorophosphate (PF <sub>6</sub> )      | 2.91       |
| Trifluoromethyltrifluoroborate              | 3.03       |
| Perfluorobutanesulfonate                    | 3.05       |
| Bis(trifluoromethanesulfonyl)amide (TFSA)   | 3.06       |

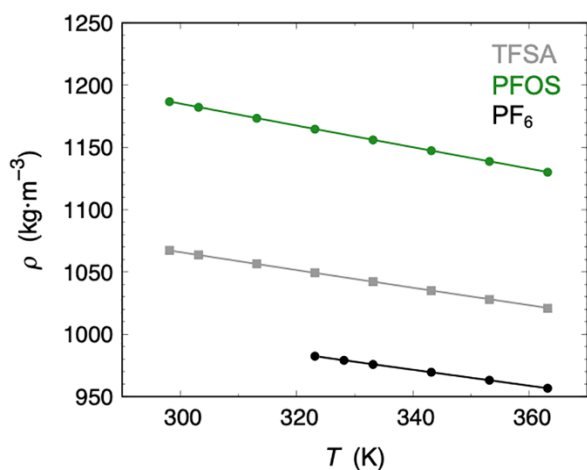

**Figure S8.** Density of  $[P_{66614}][A]$  ( $A = \text{TFSA}, \text{PFOS}, \text{and PF}_6$ ) at atmospheric pressure. The solid lines represent fits by a quadratic equation.

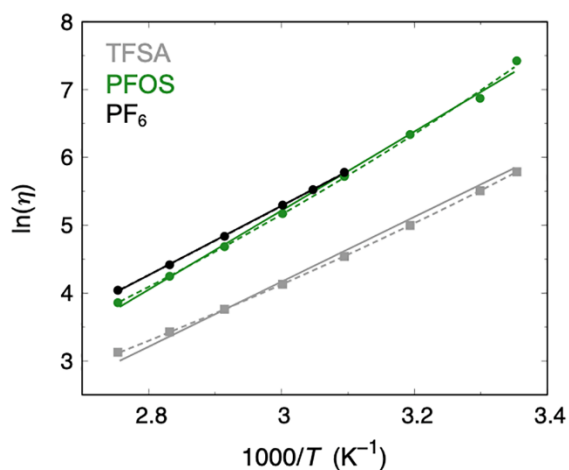

**Figure S9.** Viscosity of  $[P_{66614}][A]$  ( $A = \text{TFSA}, \text{PFOS}, \text{and PF}_6$ ) at atmospheric pressure. The solid and dashed lines represent fits using the Arrhenius and VFT equations, respectively.

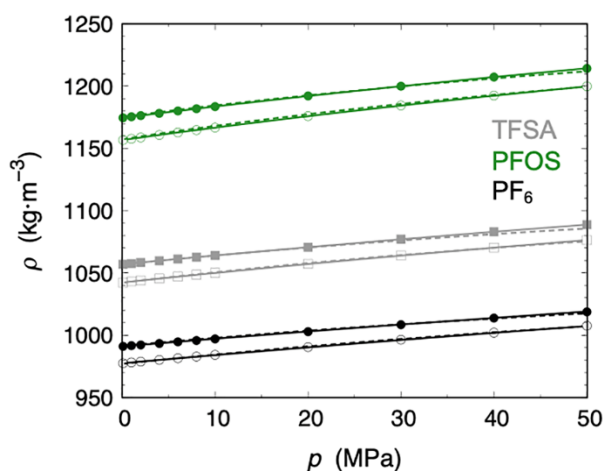

**Figure S10.** High-pressure density of  $[P_{66614}][A]$  ( $A = \text{TFSA}, \text{PFOS}, \text{and PF}_6$ ). Data at 313.15 and 333.15 K are indicated by closed and opened points, respectively. (**Solid line:** Tait equation, **dashed line:** Sanchez–Lacombe equation.)

**Table S8.** Density  $\rho$  ( $\text{kg}\cdot\text{m}^{-3}$ ) and viscosity  $\eta$  ( $\text{mPa}\cdot\text{s}$ ) of  $[\text{P}_{66614}][\text{A}]$  (A = TFSA, PFOS, and  $\text{PF}_6$ ) at atmospheric pressure. Standard uncertainties of temperature were 0.01 K. Relative expanded uncertainties for density and viscosity were 0.004 and 0.02, respectively (average of 10 measurements).

| $T$    | TFSA    |        | PFOS    |        | $\text{PF}_6$ |        |
|--------|---------|--------|---------|--------|---------------|--------|
|        | $\rho$  | $\eta$ | $\rho$  | $\eta$ | $\rho$        | $\eta$ |
| 298.15 | 1067.32 | 326.6  | 1186.74 | 1675.8 | –             | –      |
| 303.15 | 1063.70 | 246.9  | 1182.29 | 964.5  | –             | –      |
| 313.15 | 1056.53 | 147.9  | 1173.36 | 565.9  | –             | –      |
| 323.15 | 1049.38 | 93.6   | 1164.69 | 304.8  | 982.42        | 324.3  |
| 328.15 | –       | –      | –       | –      | 979.20        | 250.9  |
| 333.15 | 1042.22 | 62.1   | 1156.04 | 176.2  | 975.81        | 199.7  |
| 343.15 | 1035.08 | 43.0   | 1147.39 | 108.1  | 969.56        | 126.0  |
| 353.15 | 1027.93 | 30.8   | 1138.76 | 69.92  | 963.12        | 82.90  |
| 363.15 | 1020.81 | 22.8   | 1130.14 | 47.31  | 956.67        | 56.91  |

**Table S9.** Coefficients of the best fits for quadratic, Arrhenius, and VFT equations of  $[\text{P}_{66614}][\text{A}]$  (A = TFSA, PFOS, and  $\text{PF}_6$ ).

|                                                         | TFSA                   | PFOS                   | $\text{PF}_6$          |
|---------------------------------------------------------|------------------------|------------------------|------------------------|
| <b>Quadratic equation</b>                               |                        |                        |                        |
| $a$ ( $\text{kg}\cdot\text{m}^{-3}$ )                   | 1306.277               | 1473.098               | 1202.064               |
| $b$ ( $\text{kg}\cdot\text{m}^{-3}\cdot\text{K}^{-1}$ ) | –0.878                 | –1.035                 | –0.713                 |
| $c$ ( $\text{kg}\cdot\text{m}^{-3}\cdot\text{K}^{-2}$ ) | $2.562 \times 10^{-4}$ | $2.509 \times 10^{-4}$ | $1.029 \times 10^{-4}$ |
| ARD of fit (%)                                          | 0.013                  | 0.003                  | 0.005                  |
| <b>Arrhenius equation</b>                               |                        |                        |                        |
| $A$ ( $\text{mPa}\cdot\text{s}$ )                       | $3.708 \times 10^{-5}$ | $4.631 \times 10^{-6}$ | $4.310 \times 10^{-5}$ |
| $E_a$ ( $\text{J}\cdot\text{mol}^{-1}$ )                | 39822.709              | 48497.302              | 42509.996              |
| ARD of fit (%)                                          | 1.781                  | 1.024                  | 0.180                  |
| <b>VFT equation</b>                                     |                        |                        |                        |
| $A$ ( $\text{mPa}\cdot\text{s}$ )                       | $2.589 \times 10^{-2}$ | $1.423 \times 10^{-2}$ | $4.874 \times 10^{-4}$ |
| $B$ (K)                                                 | 1553.779               | 1749.198               | 3586.640               |
| $T_0$ (K)                                               | 133.577                | 147.462                | 55.526                 |
| ARD of fit (%)                                          | 0.095                  | 0.452                  | 0.131                  |

**Table S10.** Dependence of density  $\rho$  ( $\text{kg}\cdot\text{m}^{-3}$ ) on the pressure  $p$  (MPa) of  $[\text{P}_{66614}][\text{A}]$  (A = TFSA, PFOS, and  $\text{PF}_6$ ). Standard uncertainties of temperature and pressure were 0.01 K and 1 kPa, respectively. Relative expanded uncertainty for density was 0.001 (average of 10 measurements).

| $p$                    | $\rho$  | $p$    | $\rho$  | $p$           | $\rho$  |
|------------------------|---------|--------|---------|---------------|---------|
| $T = 313.15 \text{ K}$ |         |        |         |               |         |
| TFSA                   |         | PFOS   |         | $\text{PF}_6$ |         |
| 0.094                  | 1056.91 | 0.094  | 1174.57 | 0.103         | 991.16  |
| 1.001                  | 1057.56 | 1.000  | 1175.44 | 1.000         | 991.71  |
| 2.001                  | 1058.36 | 2.001  | 1176.34 | 2.000         | 992.28  |
| 4.000                  | 1059.81 | 3.999  | 1178.22 | 4.000         | 993.42  |
| 5.999                  | 1061.22 | 6.000  | 1180.09 | 6.000         | 994.67  |
| 8.000                  | 1062.67 | 8.000  | 1181.87 | 8.000         | 995.85  |
| 9.999                  | 1064.03 | 9.999  | 1183.66 | 10.001        | 997.05  |
| 20.001                 | 1070.73 | 20.001 | 1192.10 | 20.001        | 1002.86 |
| 30.000                 | 1077.08 | 29.999 | 1199.93 | 30.000        | 1008.52 |
| 39.999                 | 1083.07 | 39.999 | 1207.29 | 40.001        | 1013.81 |
| 50.000                 | 1088.80 | 50.001 | 1214.21 | 50.001        | 1018.85 |
| $T = 333.15 \text{ K}$ |         |        |         |               |         |
| TFSA                   |         | PFOS   |         | $\text{PF}_6$ |         |
| 0.100                  | 1042.25 | 0.099  | 1156.79 | 0.105         | 977.56  |
| 1.000                  | 1043.16 | 1.000  | 1157.73 | 1.001         | 978.18  |
| 2.000                  | 1043.96 | 2.000  | 1158.77 | 2.001         | 978.86  |
| 4.000                  | 1045.51 | 4.000  | 1160.84 | 4.000         | 980.24  |
| 6.001                  | 1047.06 | 6.001  | 1162.86 | 6.001         | 981.59  |
| 7.999                  | 1048.57 | 8.000  | 1164.82 | 8.001         | 982.90  |
| 10.000                 | 1050.06 | 10.001 | 1166.79 | 10.000        | 984.19  |
| 20.001                 | 1057.24 | 19.999 | 1175.95 | 20.000        | 990.51  |
| 30.001                 | 1063.98 | 30.000 | 1184.47 | 30.000        | 996.44  |
| 40.000                 | 1070.36 | 40.000 | 1192.42 | 40.001        | 1002.13 |
| 50.000                 | 1076.42 | 49.999 | 1199.88 | 49.999        | 1007.53 |

**Table S11.** Coefficients of the best fits of the Tait and Sanchez–Lacombe equations for the high-pressure densities of [P<sub>66614</sub>][A] (A = TFSA, PFOS, and PF<sub>6</sub>).

|                                              | TFSA                    | PFOS                    | PF <sub>6</sub>         |
|----------------------------------------------|-------------------------|-------------------------|-------------------------|
| <b>Tait Equation</b>                         |                         |                         |                         |
| $a_0$ (kg·m <sup>-3</sup> )                  | 1156.376                | 1314.128                | 1170.026                |
| $a_1$ (kg·m <sup>-3</sup> ·K <sup>-1</sup> ) | $6.991 \times 10^{-2}$  | $-2.927 \times 10^{-2}$ | $-4.669 \times 10^{-1}$ |
| $a_2$ (kg·m <sup>-3</sup> ·K <sup>-2</sup> ) | $-1.237 \times 10^{-3}$ | $-1.330 \times 10^{-3}$ | $-3.329 \times 10^{-4}$ |
| $b_0$ (MPa)                                  | 568.572                 | 589.265                 | 677.361                 |
| $b_1$ (K <sup>-1</sup> )                     | $4.658 \times 10^{-3}$  | $5.589 \times 10^{-3}$  | $4.553 \times 10^{-3}$  |
| $C$ (-)                                      | $9.112 \times 10^{-2}$  | $8.226 \times 10^{-2}$  | $1.022 \times 10^{-1}$  |
| ARD of fit (%)                               | 0.004                   | 0.004                   | 0.010                   |
| <b>Sanchez–Lacombe Equation</b>              |                         |                         |                         |
| $p^*$ (MPa)                                  | 339.886                 | 327.899                 | 382.873                 |
| $\rho^*$ (kg·m <sup>-3</sup> )               | 1142.843                | 1282.998                | 1077.066                |
| $T^*$ (K)                                    | 616.341                 | 589.517                 | 604.982                 |
| $M$ (-)                                      | 764.000                 | 982.980                 | 511.520                 |
| ARD of fit (%)                               | 0.138                   | 0.075                   | 0.085                   |

## Supporting References

- (1) Blundell, R. K.; Licence, P. Quaternary Ammonium and Phosphonium Based Ionic Liquids: A Comparison of Common Anions. *Phys. Chem. Chem. Phys.* **2014**, *16*, 15278–15288.
- (2) Kang, C. S. M.; Zhang, X.; MacFarlane, D. R. Synthesis and Physicochemical Properties of Fluorinated Ionic Liquids with High Nitrogen Gas Solubility. *J. Phys. Chem. C* **2018**, *122*, 24550–24558.
- (3) Kodama, D.; Kanakubo, M.; Kokubo, M.; Hashimoto, S.; Nanjo, H.; Kato, M. Density, Viscosity, and Solubility of Carbon Dioxide in Glymes. *Fluid Phase Equilib.* **2011**, *302*, 103–108.
- (4) Kodama, D.; Sato, K.; Watanabe, M.; Sugawara, T.; Makino, T.; Kanakubo, M. Density, Viscosity, and CO<sub>2</sub> Solubility in the Ionic Liquid Mixtures of [bmim][PF<sub>6</sub>] and [bmim][TFSA] at 313.15 K. *J. Chem. Eng. Data.* **2018**, *63*, 1036–1043.
- (5) Watanabe, M.; Kodama, D.; Makino, T.; Kanakubo, M. Density, Viscosity, and Electrical Conductivity of Protic Amidium Bis(Trifluoromethanesulfonyl)Amide Ionic Liquids. *J. Chem. Eng. Data.* **2016**, *61*, 4215–4221.
- (6) Harris, K. R.; Kanakubo, M.; Kodama, D.; Makino, T.; Mizuguchi, Y.; Watanabe, M.; Watanabe, T. Temperature and Density Dependence of the Transport Properties of the Ionic Liquid Triethylpentylphonium Bis(Trifluoromethanesulfonyl)Amide, [P<sub>222,5</sub>][Tf<sub>2</sub>N]. *J. Chem. Eng. Data.* **2018**, *63*, 2015–2027.
- (7) May, E. F.; Tay, W. J.; Nania, M.; Aleji, A.; Al-Ghafri, S.; Trusler, J. P. Physical Apparatus Parameters and Model for Vibrating Tube Densimeters at Pressures to 140 MPa and Temperatures to 473 K. *Rev. Sci. Instrum.* **2014**, *85*, 095111.
- (8) Nanda, V. S.; Simha, R. Equation of State of Polymer Liquids and Glasses at Elevated Pressures. *J. Chem. Phys.* **1964**, *41*, 3870–3878.
- (9) Sanchez, I. C.; Lacombe, R. H. An Elementary Molecular Theory of Classical Fluids. Pure Fluids. *J. Phys. Chem.* **1976**, *80*, 2352–2362.
- (10) Sanchez, I. C.; Lacombe, R. H. Statistical Thermodynamics of Polymer Solutions. *Macromolecules.* **1978**, *11*, 1145–1156.
